# Supplementary material for: Loss of the long non-coding RNA OIP5-AS1 exacerbates heart failure in a sex-specific manner
Source: PubMed Central journal article supplement — iScience. 2021 May 13;24(6):102537. doi: 10.1016/j.isci.2021.102537 (PMC8184514; doi:10.1016/j.isci.2021.102537), 2021-05-13
Supplement: mmc1.pdf [file mmc1.pdf]

**Supplemental information**

**Loss of the long non-coding RNA OIP5-AS1 exacerbates heart failure in a sex-specific manner**

**Aowen Zhuang, Anna C. Calkin, Shannen Lau, Helen Kiriazis, Daniel G. Donner, Yingying Liu, Simon T. Bond, Sarah C. Moody, Eleanor A.M. Gould, Timothy D. Colgan, Sergio Ruiz Carmona, Michael Inouye, Thomas Q. de Aguiar Vallim, Elizabeth J. Tarling, Gregory A. Quaife-Ryan, James E. Hudson, Enzo R. Porrello, Paul Gregorevic, Xiao-Ming Gao, Xiao-Jun Du, Julie R. McMullen, and Brian G. Drew**

1 **Loss of the Long Non-coding RNA OIP5-AS1 Exacerbates Heart Failure in a Sex-Specific**  
2 **Manner.**

3

4 Aowen Zhuang, Anna C. Calkin, Shannen Lau, Helen Kiriazis, Daniel G. Donner, Yingying Liu, Simon T. Bond, Sarah C. Moody,  
5 Eleanor A.M. Gould, Timothy D. Colgan, Sergio Ruiz Carmona, Michael Inouye, Thomas Q. de Aguiar Vallim, Elizabeth J. Tarling,  
6 Gregory A. Quaife-Ryan, James E. Hudson, Enzo R. Porrello, Paul Gregorevic, Xiao-Ming Gao, Xiao-Jun Du, Julie R. McMullen,  
7 Brian G. Drew

8

9

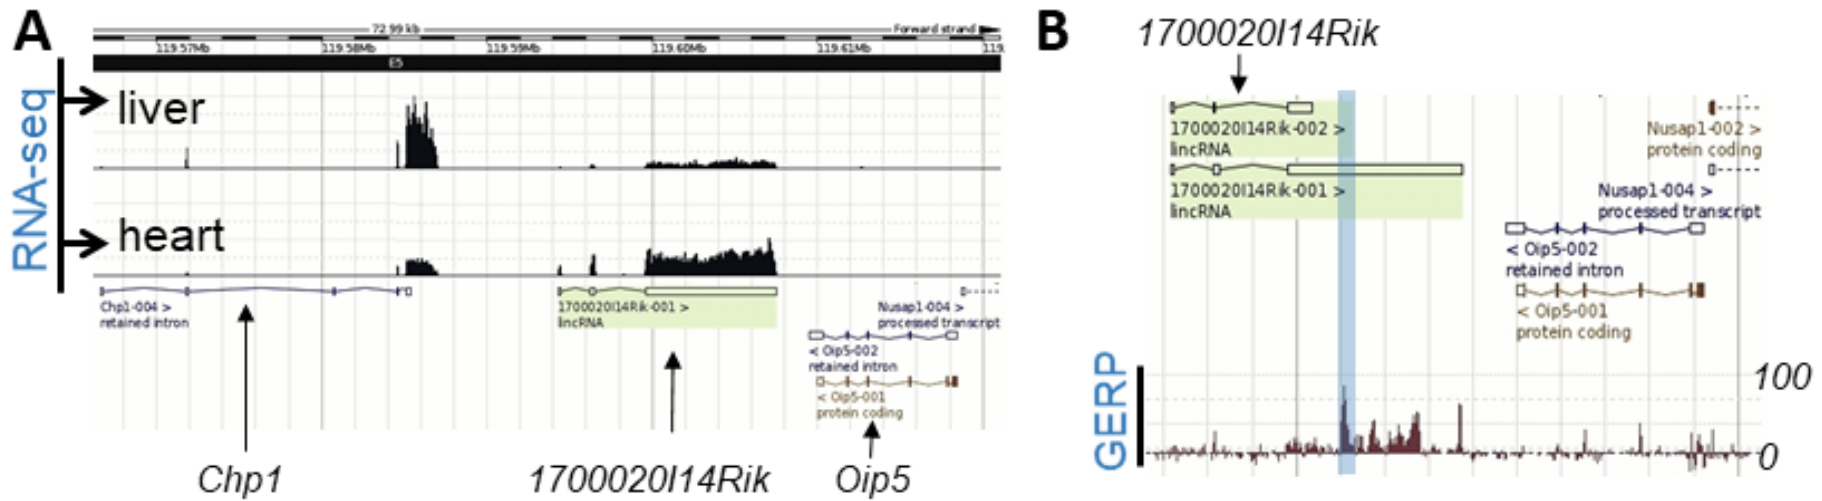

10  
11  
12  
13  
14  
15  
16

**Supplementary Figure S1: Location, expression and homology of OIP5-AS1 (Related to Figure 1)**

**A.** *Ensembl* sourced RNA-sequencing tracks of transcript expression in mouse liver and heart at the OIP5-AS1 locus. **B.** *Ensembl* sourced Genomic Evolutionary Rate Profiling (GERP) data across the OIP5-AS1 gene locus. A greater amplitude in the GERP peak indicates a greater conservation of that region across vertebrate species. Blue box indicates the region of 100% homology in exon 3.

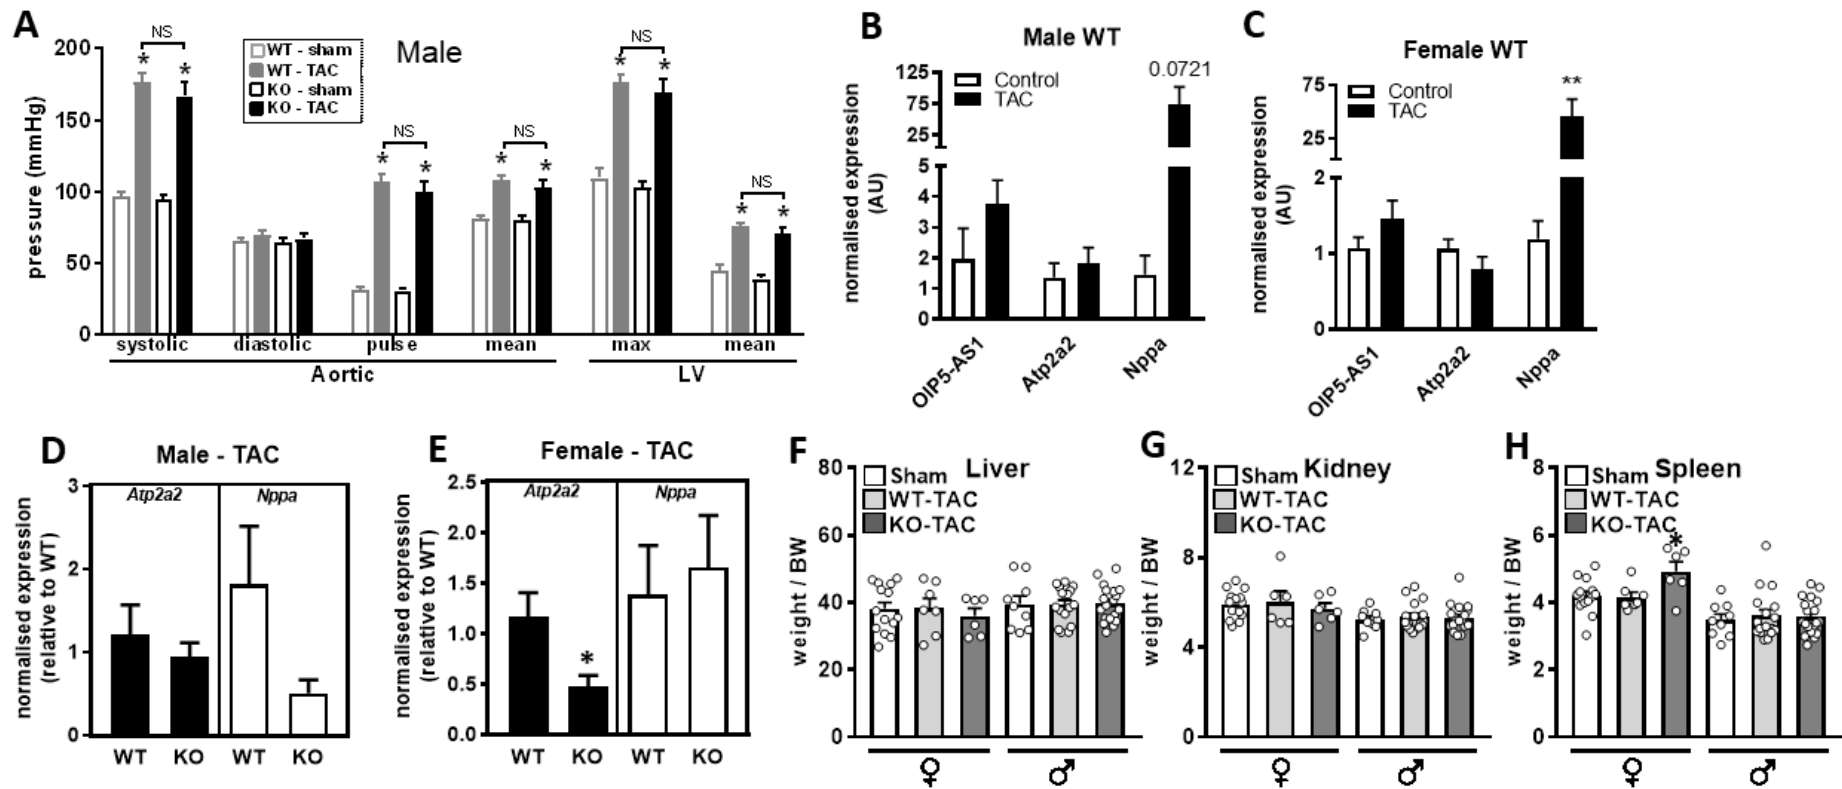

17  
 18 **Supplementary Figure S2: Additional phenotyping data from WT and KO mice undergoing Sham and TAC surgery. (related**  
 19 **to Figure 3) A.** Hemodynamic catheter measurements recorded from the aorta and left ventricle (LV) of sham and TAC operated WT  
 20 and OIP5-AS1 KO male mice (n=3-11/group, mean±SEM), \* p<0.05 versus genotype equivalent sham, NS = not significant between  
 21 WT and KO TAC treated animals. qPCR data from LVs of **B.** male WT and **C.** female WT mice for the genes OIP5-AS1, Atp2a2  
 22 (SERCA2) and Nppa (ANP) in either control or TAC operated mice, and in LVs from **D.** male WT v KO TAC or **E.** female WT v KO  
 23 TAC operated mice for the genes Atp2a2 (SERCA2) and Nppa (ANP). Organ weights adjusted to body weight (BW) in male and  
 24 female mice 8-weeks post procedure for **F.** liver, **G.** kidney and **H.** spleen. A non-parametric one-way ANOVA with multiple  
 25 comparisons correction (Dunnet's) was used to test for significance. (n=7-13/group, mean±SEM, \* p<0.05 versus sham for relevant  
 26 sex). Weights for these organs were adjusted to BW.

27



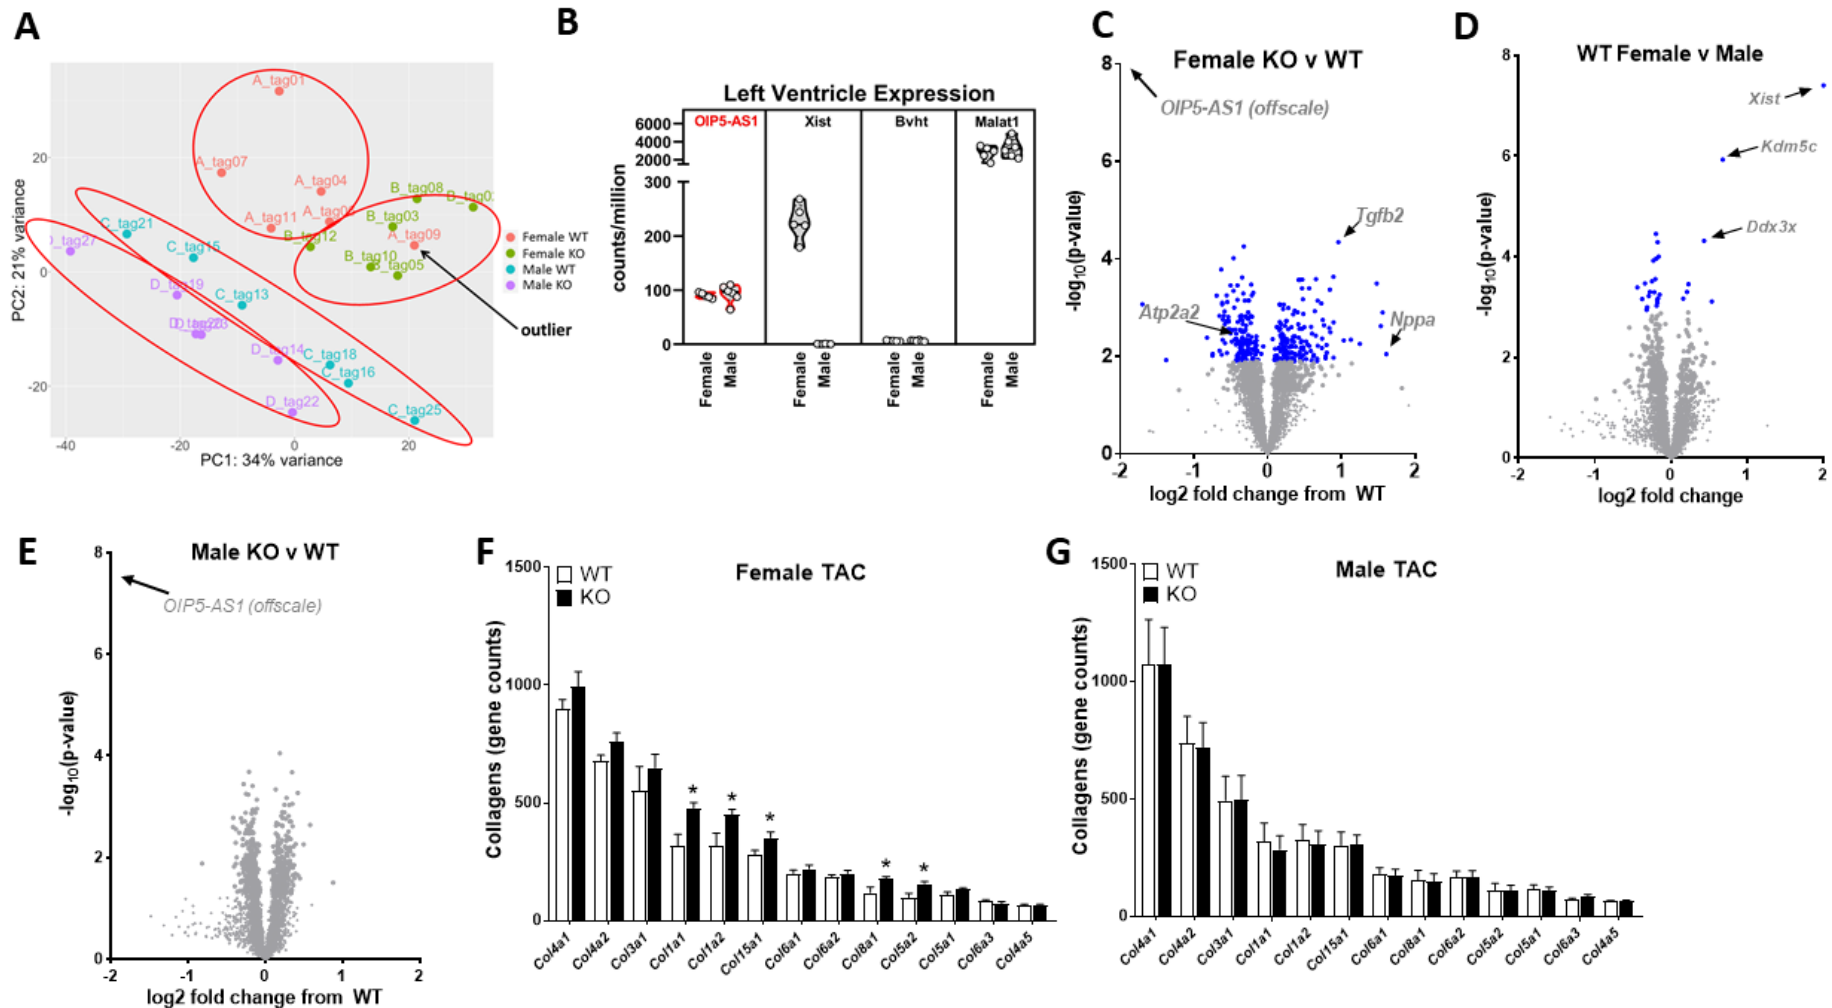

29

30 **Supplementary Figure S3: Accompanying RNA-sequencing Data Analysis. (Related to Figure 5)** A. Principle component  
 31 analysis (PCA) of RNA-sequencing data demonstrating separation of the four groups of samples based on variance (red circles).  
 32 One sample from the “Female WT” group demonstrated an inconsistent variance compared to its other group members indicating a  
 33 technical abnormality (black arrow – “outlier”) and was subsequently removed from enrichment and network analysis. **B.** Analysis of  
 34 RNA-seq data demonstrating abundance (counts per million) of OIP5-AS1 compared to three other well-known lncRNAs in cardiac

35 tissue including Xist, Braveheart (Bvht) and Malat1 across male and female WT hearts (LV). **C.** Volcano plot of genes regulated in  
36 LV following TAC between female KO and WT mice (n=5/group for female WT, n=6/group for female KO), grey dots = not-significant,  
37 blue dots = FDR<0.1). Arrows demonstrate genes known to be regulated in the setting of heart failure. **D.** Volcano plot of genes  
38 regulated in LV following TAC between female and male WT mice (n=5/group for female WT, n=6/group for male WT), grey dots =  
39 not-significant, blue dots = FDR<0.1). Arrows demonstrate known sexual dimorphic genes. **E.** Volcano plot of genes regulated in LV  
40 following TAC between male WT and KO mice (n=6/group), grey dots = not-significant. Arrow indicates that change in OIP5-AS1  
41 expression is not shown as it is off scale. Absolute transcript abundance of all collagen related genes in LV from RNA-seq data in **F.**  
42 female WT and KO mice following TAC and **G.** male WT and KO mice following TAC. A non-parametric one-way ANOVA with multiple  
43 comparisons correction (Dunnet's) was used to test for significance. (\* p<0.05 versus WT, n=5-6/group).

44  
45  
46
